# Supplementary material for: Genetic Architecture Promotes the Evolution and Maintenance of Cooperation
Source: PLOS journal article supplement (doi:10.1371/journal.pcbi.1003339), 2013-11-21

Correlation between benefit from secretion  
and amount secreted

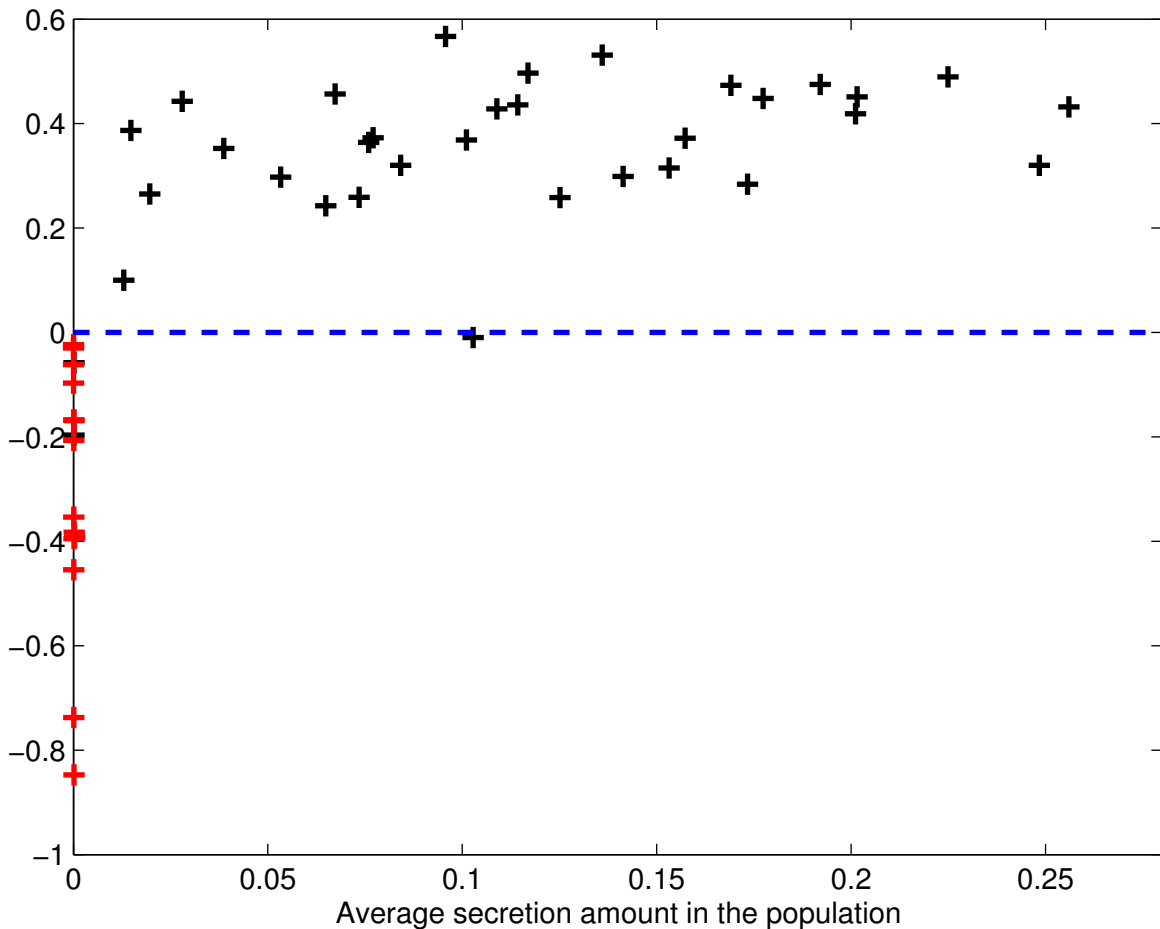

Supplement: S3 (10.1371/journal.pcbi.1003339.s003) [file journal.pcbi.1003339.s003]
